# Supplementary material for: Phase I/II Study of LDE225 in Combination with Gemcitabine and Nab-Paclitaxel in Patients with Metastatic Pancreatic Cancer
Source: MDPI journal article supplement (doi:10.3390/cancers13194869), 2021-09-28
Supplement: s1 [file s1]

## Article

# Phase I/II Study of LDE225 in Combination with Gemcitabine and Nab-Paclitaxel in Patients with Metastatic Pancreatic Cancer

Esther N. Pijnappel <sup>1</sup>, Nienke P.M. Wassenaar <sup>2</sup>, Oliver J. Gurney-Champion <sup>2</sup>, Remy Klaassen <sup>1</sup>, Koen van der Lee <sup>1</sup>, Marjolein C.H. Pleunis-van Empel <sup>3</sup>, Dick J. Richel <sup>1</sup>, Marie C. Legdeur <sup>3</sup>, Aart J. Nederveen <sup>2</sup>, Hanneke W.M. van Laarhoven <sup>1</sup> and Johanna W. Wilmink <sup>1,\*</sup>

## Supplementary Materials:

The following are available online at [www.mdpi.com/xxx/s1](http://www.mdpi.com/xxx/s1), Table S1: Summary of the relevant MRI parameters for IVIM-DWI, DCE MRI and T1 mapping; Table S2. CA 19.9 levels at baseline and at evaluation of the 36 patients who received a baseline MRI scan.

**Table S1.** Summary of the relevant MRI parameters for IVIM-DWI, DCE MRI and T1 mapping.

|                                                       | IVIM-DWI                                                                                              | DCE                        | T1 look-locker              |
|-------------------------------------------------------|-------------------------------------------------------------------------------------------------------|----------------------------|-----------------------------|
| FOV (RL × AP) (mm <sup>2</sup> )                      | 432 × 108                                                                                             | 400 × 400                  | 400 × 350                   |
| Acquisition matrix                                    | 144 × 34                                                                                              | 160 × 160                  | 132 × 116                   |
| Slices                                                | 18                                                                                                    | 30                         | 13                          |
| Slice thickness/gap (mm)                              | 3.7/0.3                                                                                               | 2.5 (5.0 non-interpolated) | 5.7 (11.4 non-interpolated) |
| TR/TE (ms)                                            | >2200/45                                                                                              | 3.19/2.0                   | 3.5/1.6                     |
| FA (°)                                                | 90                                                                                                    | 20                         | 8                           |
| Parallel imaging                                      | 1.3 (AP)                                                                                              | 3.6/1.5 (RL/AP)            | 3/1.3 (RL/AP)               |
| Respiratory compensation                              | Respiratory trigger (navigator)                                                                       | Postprocessing             | 1 breath-hold               |
| Fat saturation                                        | Gradient reversal during slice selection + SPIR                                                       | -                          | -                           |
| b-values (s/mm <sup>2</sup> ) and directions/averages | 0 (15), 10 (9), 20 (9), 30 (9), 40 (9), 50 (9), 75 (4), 100 (12), 150 (4), 250 (4), 400 (4), 600 (16) | -                          | -                           |
| Diffusion times $\delta/\Delta$ (ms)                  | 10.1/22.6                                                                                             | -                          | -                           |

FOV: field of view, RL: right left, AP: anterior posterior, TR: repetition time, TE: echo time, FA: flip angle, SPIR: spectral presaturation with inversion recovery.

**Table S2.** CA 19.9 levels at baseline and at evaluation of the 36 patients who received a baseline MRI scan.

| Patient | Baseline CA 19-9 in kU/L | Evaluation (8 weeks) CA 19-9 in kU/L |
|---------|--------------------------|--------------------------------------|
| 1.      | 9                        | 14                                   |
| 2.      | 1667                     | 454                                  |
| 3.      | 1453                     | 1256                                 |

|     |        |       |
|-----|--------|-------|
| 4.  | 352    | 293   |
| 5.  | 171394 | 217   |
| 6.  | N.D.   | N.D.  |
| 7.  | N.D.   | N.D.  |
| 8.  | 171088 | 57801 |
| 9.  | 11260  | 5800  |
| 10. | 57300  | 52246 |
| 11. | 3380   | 13371 |
| 12. | 745    | 786   |
| 13. | 4744   | 719   |
| 14. | N.D.   | N.D.  |
| 15. | N.D.   | N.D.  |
| 16. | 419660 | N.D.  |
| 17. | N.D.   | N.D.  |
| 18. | N.D.   | N.D.  |
| 19. | 6203   | 1681  |
| 20. | N.D.   | N.D.  |
| 21. | 25697  | N.D.  |
| 22. | N.D.   | 1814  |
| 23. | 591    | 262   |
| 24. | 2252   | 1125  |
| 25. | 9250   | 5977  |
| 26. | N.D.   | N.D.  |
| 27. | 1107   | 2321  |
| 28. | 904    | 1076  |
| 29. | 30     | N.D.  |
| 30. | 4088   | 182   |
| 31. | 13522  | 208   |
| 32. | 180    | 194   |
| 33. | 8583   | 8876  |
| 34. | 3      | 6     |
| 35. | 4077   | 864   |
| 36. | 101833 | 68696 |

N.D.: not defined.
